# Supplementary material
Source: publisher figshare collection journal article supplement (https://tandf.figshare.com/articles/dataset/_/21320660)
Supplement: Supplementary file 1 [file 1]

# Basic price of agricultural soils in Slovakia

Jozef Vilček, Štefan Buday, Štefan Koco & Monika Lörincová,  
National Agricultural and Food Centre - Soil Science and Conservation Research Institute  
University of Prešov - Faculty of Humanities and Natural Sciences

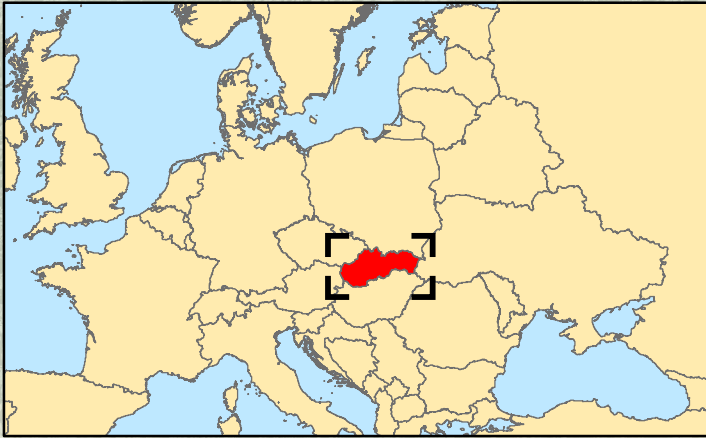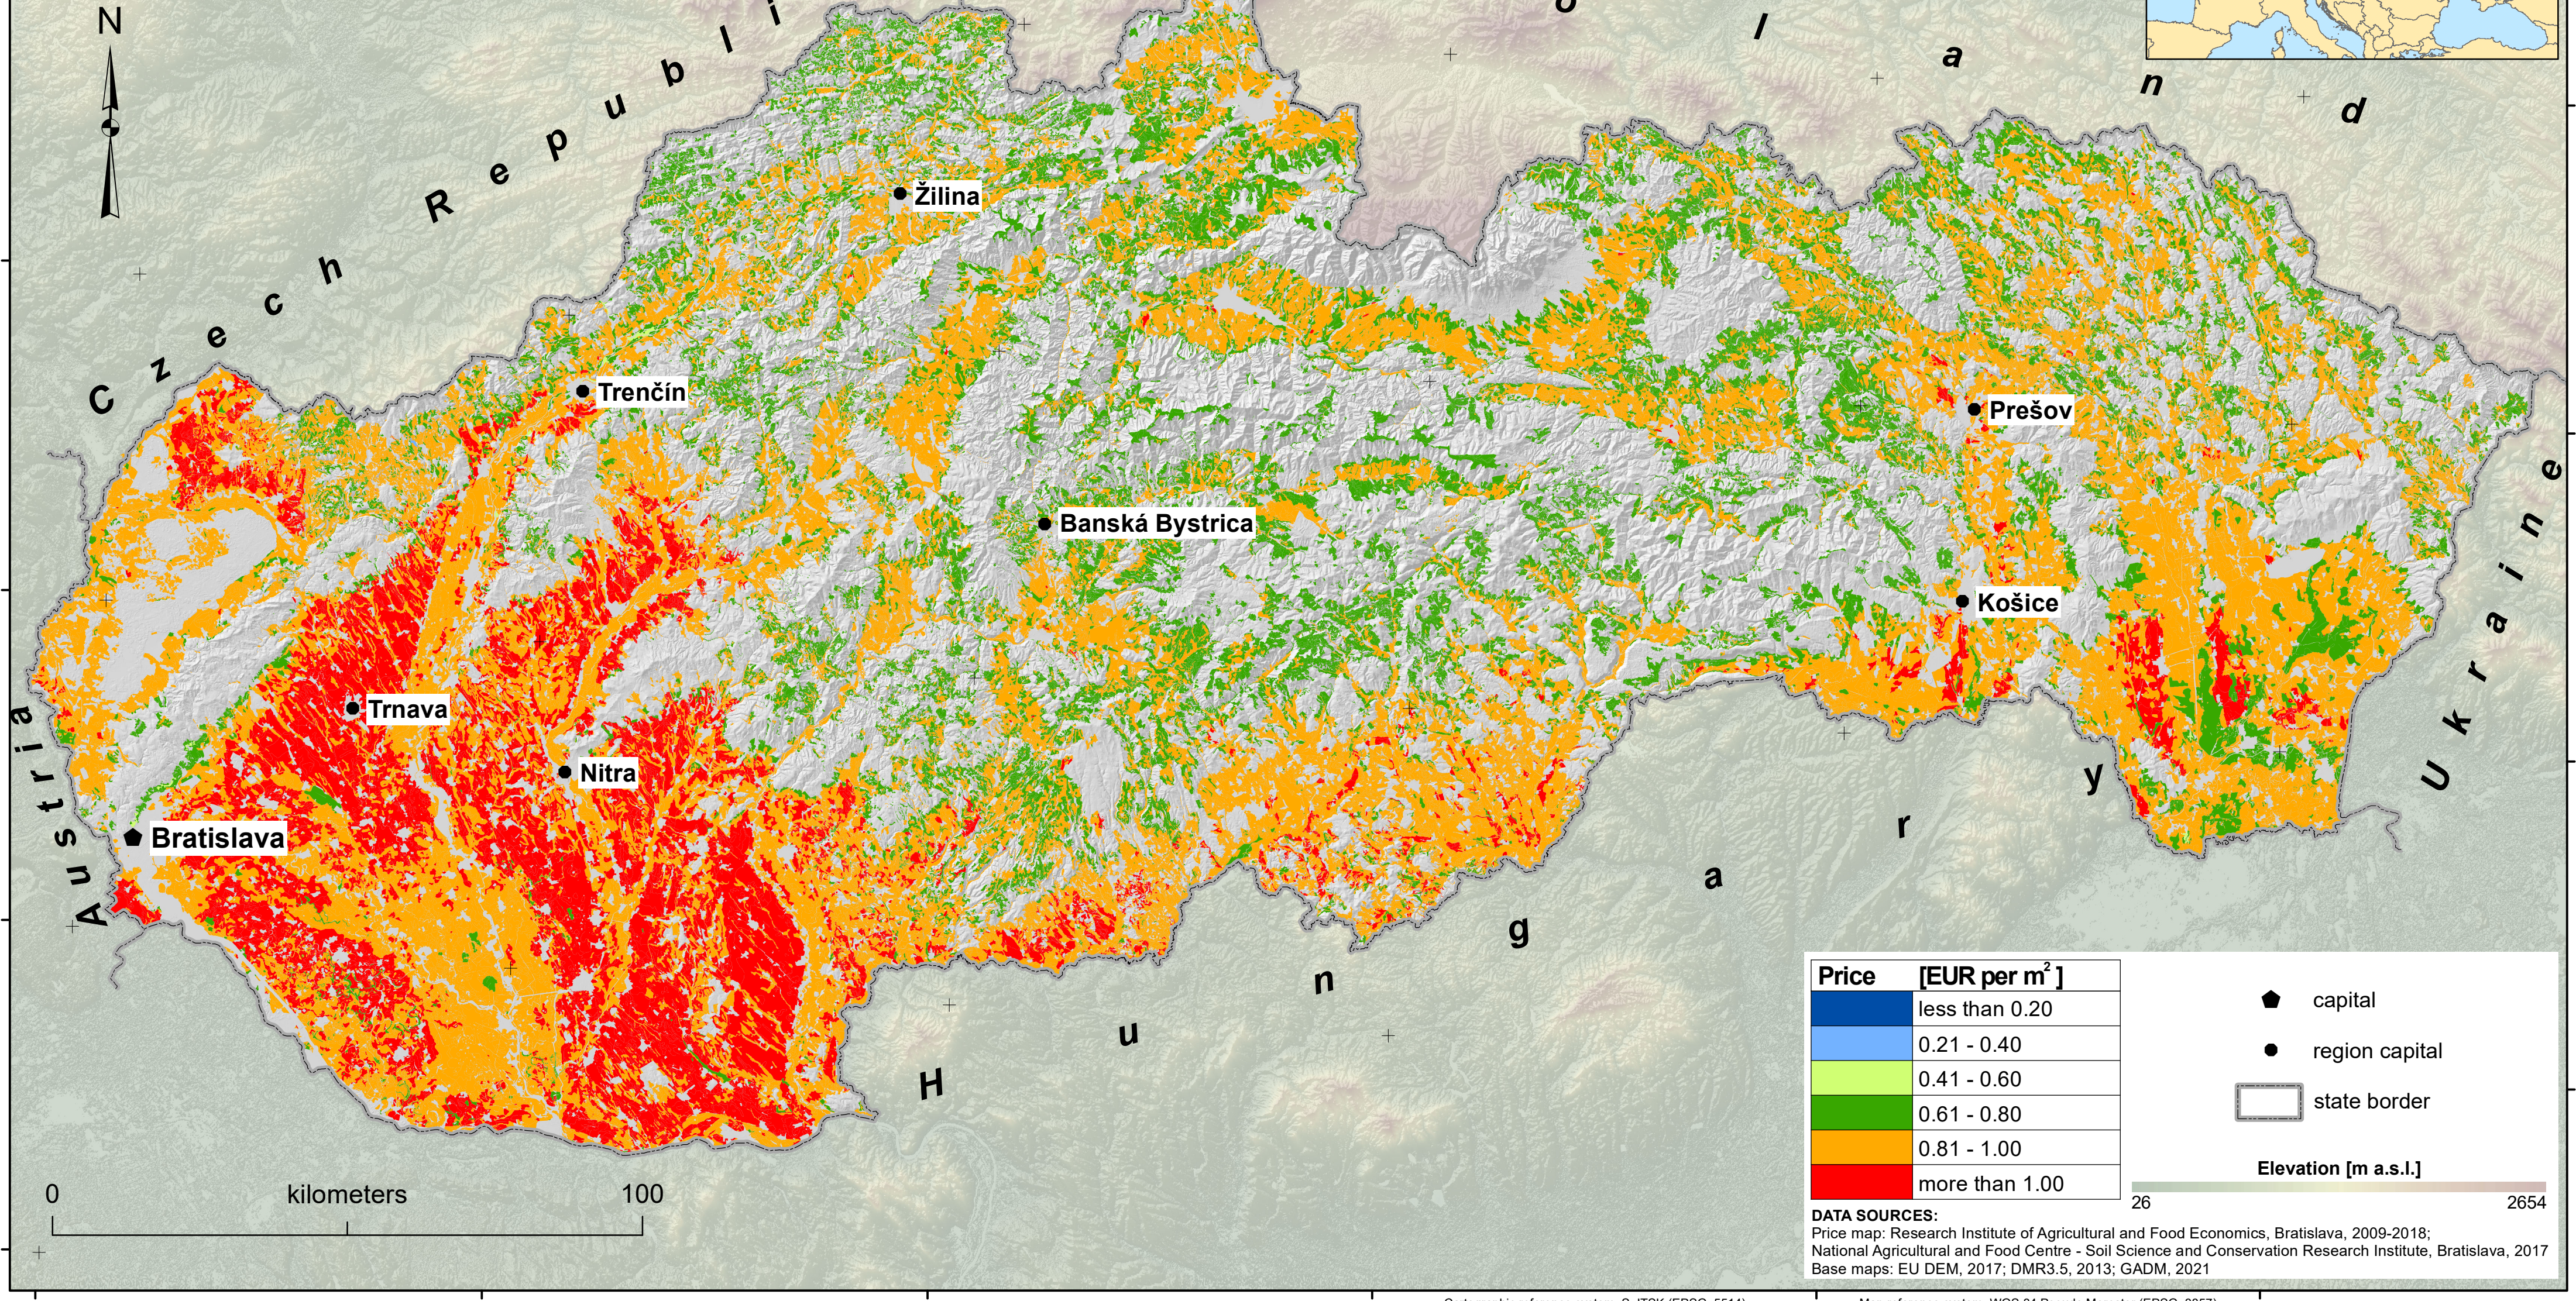

| Price | [EUR per m <sup>2</sup> ] |
|-------|---------------------------|
|       | less than 0.20            |
|       | 0.21 - 0.40               |
|       | 0.41 - 0.60               |
|       | 0.61 - 0.80               |
|       | 0.81 - 1.00               |
|       | more than 1.00            |

- capital
- region capital
- state border

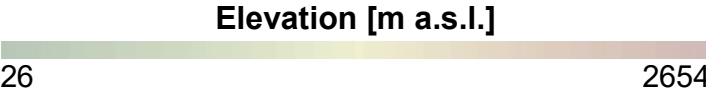

**DATA SOURCES:**  
Price map: Research Institute of Agricultural and Food Economics, Bratislava, 2009-2018;  
National Agricultural and Food Centre - Soil Science and Conservation Research Institute, Bratislava, 2017  
Base maps: EU DEM, 2017; DMR3.5, 2013; GADM, 2021
