# Supplementary material
Source: publisher figshare collection journal article supplement (https://tandf.figshare.com/articles/dataset/_/21320660)
Supplement: Supplementary file 1 [file 1]

**Map Design**

The final map - Map of the basic price of agricultural soils depending on static soil parameters is a result of spatial overlapping of partial vector layers, specifically the layer of cadastral plots containing land price attribute and Soil Ecological Units with presented soil parameters attributes included. The final vector layer of the basic price of agricultural soils is shown only for agricultural areas in Slovakia. Color classification of the price of agricultural soils is identical with color ramps of spatial differentiation of soil prices based on individual soil parameters showed in partial figures. Non-agricultural areas are visualised by relief shading to highlight the color classification of the soil price. Areas of neighboring countries are visualised using colorized digital elevation model (EU-DEM) obtained from European Environment Agency. All national digital data are created and managed in the local coordinate system S-JTSK (EPSG: 5514). EU-DEM data are projected in the ETRS89-LAEA (EPSG:3035) coordinate system. The final map layout was constructed using the WGS 84 Pseudo Mercator coordinate system (EPSG:3857) due to different projection systems of used data.
